# Supplementary material
Source: MDPI journal article supplement (https://www.mdpi.com/2077-1312/10/4/521)
Supplement: s1 [file s1]

| VITALITY (%) | CTRL |     |     |     |     |     |     |     |     |      | MEANS | D.S. | EXPOSED |     |     |     |     |     |     |     |     |      | MEANS | D.S. |
|--------------|------|-----|-----|-----|-----|-----|-----|-----|-----|------|-------|------|---------|-----|-----|-----|-----|-----|-----|-----|-----|------|-------|------|
|              | A:1  | A:2 | A:3 | A:4 | A:5 | A:6 | A:7 | A:8 | A:9 | A:10 |       |      | B:1     | B:2 | B:3 | B:4 | B:5 | B:6 | B:7 | B:8 | B:9 | B:10 |       |      |
| 10 min       | 87   | 90  | 90  | 97  | 97  | 98  | 98  | 98  | 98  | 98   | 95,1  | 4,09 | 31      | 31  | 32  | 38  | 38  | 40  | 43  | 44  | 45  | 39   | 38,1  | 5,26 |
| 20 min       | 80   | 86  | 89  | 93  | 94  | 95  | 97  | 98  | 98  | 98   | 92,8  | 5,74 | 23      | 25  | 26  | 30  | 32  | 34  | 35  | 36  | 37  | 42   | 32,0  | 6,00 |
| 30 min       | 85   | 85  | 87  | 89  | 91  | 92  | 93  | 96  | 97  | 97   | 91,2  | 4,40 | 20      | 21  | 21  | 23  | 25  | 29  | 31  | 33  | 37  | 39   | 27,9  | 6,94 |
| 40 min       | 83   | 87  | 86  | 84  | 88  | 89  | 90  | 91  | 93  | 92   | 88,3  | 3,16 | 10      | 13  | 14  | 16  | 15  | 17  | 18  | 21  | 22  | 25   | 17,1  | 4,53 |
| 60 min       | 80   | 82  | 83  | 83  | 84  | 85  | 90  | 90  | 91  | 91   | 85,9  | 3,96 | 2       | 2   | 2   | 4   | 3   | 5   | 3   | 6   | 11  | 12   | 5,0   | 3,68 |

| MOTILITY (%) | CTRL |     |     |     |     |     |     |     |     |      | MEANS | D.S. | EXPOSED |     |     |     |     |     |     |     |     |      | MEANS | D.S. |
|--------------|------|-----|-----|-----|-----|-----|-----|-----|-----|------|-------|------|---------|-----|-----|-----|-----|-----|-----|-----|-----|------|-------|------|
|              | A:1  | A:2 | A:3 | A:4 | A:5 | A:6 | A:7 | A:8 | A:9 | A:10 |       |      | B:1     | B:2 | B:3 | B:4 | B:5 | B:6 | B:7 | B:8 | B:9 | B:10 |       |      |
| 10 min       | 83   | 90  | 89  | 87  | 91  | 96  | 94  | 92  | 97  | 98   | 91,7  | 4,72 | 33      | 38  | 35  | 40  | 38  | 47  | 45  | 41  | 40  | 45   | 40,2  | 4,49 |
| 20 min       | 83   | 83  | 85  | 92  | 91  | 92  | 93  | 93  | 94  | 93   | 89,9  | 4,41 | 30      | 35  | 36  | 46  | 35  | 42  | 44  | 46  | 45  | 46   | 40,5  | 5,93 |
| 30 min       | 79   | 80  | 88  | 85  | 90  | 89  | 91  | 92  | 93  | 94   | 88,1  | 5,22 | 17      | 19  | 17  | 20  | 21  | 20  | 22  | 28  | 33  | 34   | 23,1  | 6,30 |
| 40 min       | 79   | 80  | 84  | 83  | 86  | 85  | 85  | 88  | 87  | 89   | 84,6  | 3,24 | 2       | 3   | 2   | 5   | 4   | 6   | 8   | 7   | 11  | 26   | 7,4   | 7,12 |
| 60 min       | 78   | 79  | 80  | 79  | 80  | 81  | 81  | 83  | 84  | 85   | 81,0  | 2,31 | 1       | 2   | 3   | 2   | 4   | 5   | 7   | 6   | 9   | 11   | 5,0   | 3,27 |
