# Supplementary material
Source: MDPI journal article supplement (https://www.mdpi.com/2077-1312/10/4/521)
Supplement: s1 [file s1]

| Unpaired t test<br>Tabular results |                                            |                    |
|------------------------------------|--------------------------------------------|--------------------|
|                                    |                                            |                    |
| 1                                  | Table Analyzed                             | Vitality rate      |
| 2                                  |                                            |                    |
| 3                                  | Column B                                   | EXPOSED            |
| 4                                  | vs.                                        | vs.                |
| 5                                  | Column A                                   | CTRL               |
| 6                                  |                                            |                    |
| 7                                  | <b>Unpaired t test</b>                     |                    |
| 8                                  | P value                                    | <0.0001            |
| 9                                  | P value summary                            | ****               |
| 10                                 | Significantly different (P < 0.05)?        | Yes                |
| 11                                 | One- or two-tailed P value?                | Two-tailed         |
| 12                                 | t, df                                      | t=10.96, df=8      |
| 13                                 |                                            |                    |
| 14                                 | <b>How big is the difference?</b>          |                    |
| 15                                 | Mean of column A                           | 90.66              |
| 16                                 | Mean of column B                           | 24.02              |
| 17                                 | Difference between means (B - A) $\pm$ SEM | -66.64 $\pm$ 6.080 |
| 18                                 | 95% confidence interval                    | -80.66 to -52.62   |
| 19                                 | R squared (eta squared)                    | 0.9376             |
| 20                                 |                                            |                    |
| 21                                 | <b>F test to compare variances</b>         |                    |
| 22                                 | F, DFn, Dfd                                | 13.00, 4, 4        |
| 23                                 | P value                                    | 0.0291             |
| 24                                 | P value summary                            | *                  |
| 25                                 | Significantly different (P < 0.05)?        | Yes                |
| 26                                 |                                            |                    |
| 27                                 | <b>Data analyzed</b>                       |                    |
| 28                                 | Sample size, column A                      | 5                  |
| 29                                 | Sample size, column B                      | 5                  |
