# Supplementary material
Source: MDPI journal article supplement (https://www.mdpi.com/2077-1312/10/4/521)
Supplement: s1 [file s1]

| Paired t test<br>Tabular results |                                          |                  |
|----------------------------------|------------------------------------------|------------------|
|                                  |                                          |                  |
| 1                                | Table Analyzed                           | Motility rate    |
| 2                                |                                          |                  |
| 3                                | Column B                                 | EXPOSED          |
| 4                                | vs.                                      | vs.              |
| 5                                | Column A                                 | CTRL             |
| 6                                |                                          |                  |
| 7                                | <b>Paired t test</b>                     |                  |
| 8                                | P value                                  | 0.0004           |
| 9                                | P value summary                          | ***              |
| 10                               | Significantly different (P < 0.01)?      | Yes              |
| 11                               | One- or two-tailed P value?              | Two-tailed       |
| 12                               | t, df                                    | t=10.88, df=4    |
| 13                               | Number of pairs                          | 5                |
| 14                               |                                          |                  |
| 15                               | <b>How big is the difference?</b>        |                  |
| 16                               | Mean of differences (B - A)              | -63.82           |
| 17                               | SD of differences                        | 13.12            |
| 18                               | SEM of differences                       | 5.867            |
| 19                               | 99% confidence interval                  | -90.83 to -36.81 |
| 20                               | R squared (partial eta squared)          | 0.9673           |
| 21                               |                                          |                  |
| 22                               | <b>How effective was the pairing?</b>    |                  |
| 23                               | Correlation coefficient (r)              | 0.9455           |
| 24                               | P value (one tailed)                     | 0.0076           |
| 25                               | P value summary                          | **               |
| 26                               | Was the pairing significantly effective? | Yes              |
