# Supplementary material
Source: MDPI journal article supplement (https://www.mdpi.com/2077-1312/10/4/521)
Supplement: s1 [file s1]

Archive with 5 entries (5 files):
- Table S1_Paired t-test Vitality.pdf
- Table S2_Paired t-test Motility.pdf
- Table S3_ Unpaired t-test Vitality.pdf
- Table S4_Unpaired t-test Motility.pdf
- Table S5_excel data.pdf
